# Supplementary material
Source: publisher figshare collection journal article supplement (https://acs.figshare.com/ndownloader/files/5737083)
Supplement: Supplementary file 1 [file 5737083]

**Reversing the Role of the Metal-oxygen  $\pi$ -bond. Chemoselective Catalytic Reductions with a Rhenium(V)-Dioxo Complex**

**Joshua J. Kennedy-Smith, Kristine A. Nolin, Haluna P. Gunterman, F. Dean Toste\***

*Center for New Directions in Organic Synthesis, Department of Chemistry, University of California, Berkeley, California 94720*

**Supporting Information**

**General Information.** Unless otherwise noted all commercial materials were used without purification. Reactions were carried out open to atmosphere in Fisher Scientific disposable borosilicate culture tubes. ACS grade (0.05 % H<sub>2</sub>O) benzene and tetrahydrofuran (THF) were obtained from EM Science. Silanes were purchased from Aldrich Chemical Company. Iododioxo(bis(triphenylphosphine)rhenium(V) (**1**) was prepared in two steps from potassium rhennate as described below. Alternatively it could be purchased from Aldrich Chemical Company at lower purity. TLC analysis of reaction mixtures was performed on Merck silica gel 60 F<sub>254</sub> TLC plates. Chromatography was carried out on ICN SiliTech 32-63 D 60 Å silica gel. <sup>1</sup>H and <sup>13</sup>C NMR spectra were recorded with Bruker AMX-300 and AMX-400 spectrometers and referenced to CDCl<sub>3</sub> unless otherwise noted. IR spectra were recorded on NaCl plates with an ATI Mattson Gemini FTIR spectrometer. Mass spectral and CHN data were obtained via the Micro-Mass/Analytical Facility operated by the College of Chemistry, University of California, Berkeley.

**Preparation of Iododioxo(bis(triphenylphosphine)rhenium(V) (**1**).** To a white suspension of potassium perhennate (3.54g, 12.3 mmol) in absolute ethanol (105 mL)

was added triphenylphosphine (17.70g, 67.5 mmol) followed by 47% hydriodic acid (18 mL). The reaction mixture was then brought to reflux in an oil bath and allowed to stir for 1h. After this time the brownish-green slurry was removed from the heat and cooled to room temperature. The mixture was then filtered over a Buchner funnel, washed copiously with 95% ethanol, and air dried on the funnel to oxodiiodo(ethoxo)bis(triphenylphosphine)rhenium(V) (~11.5 g) as an olive green powder.

This solid was then suspended in acetone (575 mL) and water (23 mL) was added. The reaction mixture was then stirred and at which point a noticeable color change occurs within 5 min. After 1h the purple slurry was filtered over a Buchner funnel, washed with acetone (2 x 250 mL) and then ethanol (250 mL). The solid was dried *in vacuo* to provide **1** (6.4 g, 60% two steps) as a purple powder.

**General Procedure for Hydrosilylation of Aldehydes with 1 in Benzene.** To a small test tube equipped with a magnetic stir bar and charged with a solution of aldehyde (100 mg or 100  $\mu$ L, 1 eq) in benzene (1M) was added silane (1.2 eq) followed by catalyst **1** (2 mol%). The reaction mixture was then placed in a pre-heated oil bath (60 °C) and monitored periodically by TLC. Upon completion the reaction mixture was diluted with hexanes (~4 mL), loaded directly on to a silica gel column and chromatographed with the appropriate mixture of hexanes and diethyl ether to give the silyl ether.

**General Procedure for Hydrosilylation of Aldehydes with 1 in THF.** To a small test tube equipped with a magnetic stir bar and charged with a solution of aldehyde (100 mg

or 100  $\mu$ L, 1 eq) in THF (1M) was added silane (1.2 eq) followed by **1** (2 mol%). The reaction mixture was then placed in a pre-heated oil bath (60  $^{\circ}$ C) and monitored periodically by TLC. Upon completion the reaction mixture was concentrated *in vacuo*, diluted with a small amount hexanes and diethyl ether ( $\sim$ .5 mL), loaded on to a silica gel column, and chromatographed with the appropriate mixture of hexanes and diethyl ether to give the silyl ether.

**General Procedure for Hydrosilylation of Ketones with **1** in Benzene.** To a small test tube equipped with a magnetic stir bar and charged with a solution of ketone (100 mg or 100  $\mu$ L, 1 eq) in benzene (1M) was added silane (1.2 eq) followed by **1** (2 mol%). The reaction mixture was then placed in a pre-heated oil bath (80  $^{\circ}$ C) and monitored periodically by TLC. Upon completion the reaction mixture was diluted with hexanes ( $\sim$ .4 mL), loaded directly on to a silica gel column, and chromatographed with the appropriate mixture of hexanes and diethyl ether to give the silyl ether.

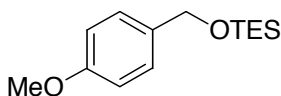

**Triethyl-(4-methoxy-benzyloxy)-silane (3a).**  $^1\text{H}$  NMR (300 MHz,  $\text{CDCl}_3$ )  $\delta$  7.26 (m, 2H), 6.87 (m, 2H), 4.67 (s, 2H), 3.81 (s, 3H), 0.97 (t,  $J = 7.8$ , 3H), 0.64 (q,  $J = 7.9$ , 2H);  $^{13}\text{C}$  NMR (100 MHz,  $\text{CDCl}_3$ )  $\delta$  159.0, 133.5, 127.8, 113.7, 64.5, 55.3, 6.8, 4.5; IR (neat) 2954, 1613, 1513, 1246  $\text{cm}^{-1}$ ; HRMS (EI) calc. for  $[\text{C}_{14}\text{H}_{24}\text{O}_2\text{Si}]^+$  252.1546, found 252.1549; CHN calc.: C, 66.61; H, 9.58, found: C, 66.28; H, 9.61.

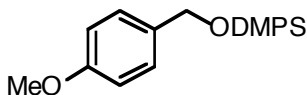

**(4-Methoxy-benzyloxy)-dimethyl-phenyl-silane (3b).**  $^1\text{H}$  NMR (300 MHz,  $\text{CDCl}_3$ )  $\delta$  7.27-7.24 (m, 2H), 7.41-7.33 (m, 3H), 7.21 (m, 2H), 6.85 (m, 2H), 4.62 (s, 2H), 3.80 (s, 3H), 0.40 (s, 6H);  $^{13}\text{C}$  NMR (100 MHz,  $\text{CDCl}_3$ )  $\delta$  159.0, 136.0, 134.5, 132.8, 129.9, 128.2, 128.0, 113.7, 65.1, 55.3, -2.8; IR (neat) 3068, 1613, 1513, 1247  $\text{cm}^{-1}$ ; HRMS (EI) calc. for  $[\text{C}_{21}\text{H}_{22}\text{O}_2\text{Si}]^+$  334.1389, found 334.1384; CHN calc.: C, 75.41; H, 6.63, found: C, 75.26; H, 6.88.

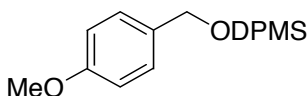

**(4-Methoxy-benzyloxy)-methyl-diphenyl-silane (3c).**  $^1\text{H}$  NMR (300 MHz,  $\text{CDCl}_3$ )  $\delta$  7.64-7.61 (m, 4H), 7.46-7.35 (m, 6H), 7.24 (m, 2H), 6.86 (m, 2H), 4.74 (s, 2H), 3.81 (s, 3H), 0.65 (s, 3H);  $^{13}\text{C}$  NMR (100 MHz,  $\text{CDCl}_3$ )  $\delta$  158.9, 136.0, 127.8, 113.7, 64.5, 55.3, 6.8, 4.5; IR (neat) 2954, 1613, 1513, 1246  $\text{cm}^{-1}$ ; HRMS (EI) calc. for  $[\text{C}_{14}\text{H}_{24}\text{O}_2\text{Si}]^+$  252.1546, found 252.1549; CHN calc.: C, 66.61; H, 9.58, found: C, 66.28; H, 9.61.

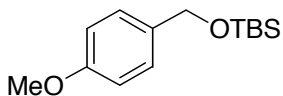

***tert*-Butyl-(4-methoxy-benzyloxy)-dimethyl-silane (3d).**  $^1\text{H}$  NMR (300 MHz,  $\text{CDCl}_3$ )  $\delta$  7.25 (m, 2H), 6.88 (m, 2H), 4.68 (s, 2H), 3.81 (s, 3H), 0.94 (s, 9H), 0.10 (s, 6H);  $^{13}\text{C}$  NMR (100 MHz,  $\text{CDCl}_3$ )  $\delta$  158.7, 133.6, 127.5, 113.6, 64.7, 55.3, 26.0, 18.4, -5.2; IR

(neat) 1513, 1464, 1248, 1087, 837  $\text{cm}^{-1}$ ; HRMS (EI) calcd for  $[\text{C}_{14}\text{H}_{24}\text{O}_2\text{Si}]^+$  252.1553, Found 252.1546; CHN calc.: C, 66.61; H 9.58, found C 66.52; H 9.89

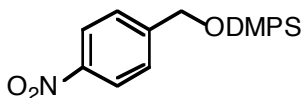

**Dimethyl-(4-nitro-benzyloxy)-phenyl-silane (5a).**  $^1\text{H}$  NMR (300 MHz,  $\text{CDCl}_3$ )  $\delta$  8.18 (m, 2H), 7.60-7.57 (m, 2H), 7.47-7.37 (m, 5H), 7.05-7.01 (m, 2H), 4.77 (s, 2H), 0.45 (s, 6H);  $^{13}\text{C}$  NMR (75 MHz,  $\text{CDCl}_3$ )  $\delta$  148.8, 147.4, 137.2, 133.8, 130.4, 128.4, 127.0, 123.9, 64.2, -1.5; IR (neat) 2958, 1521, 1346  $\text{cm}^{-1}$ ; HRMS (EI) calc. for  $[\text{C}_{15}\text{H}_{17}\text{NO}_3\text{Si}]^+$  300.1182, found 300.1185; CHN calc.: C, 62.69; H, 5.96; N, 4.87, found: C, 62.58; H, 6.24; N, 5.01.

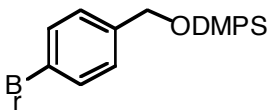

**(4-Bromo-benzyloxy)-dimethyl-phenyl-silane (5b).**  $^1\text{H}$  NMR (300 MHz,  $\text{CDCl}_3$ )  $\delta$  7.61-7.57 (m, 2H), 7.48-7.38 (m, 5H), 7.17 (m, 2H), 4.64 (s, 2H), 0.42 (s, 6H);  $^{13}\text{C}$  NMR (100 MHz,  $\text{CDCl}_3$ )  $\delta$  139.8, 137.3, 133.6, 131.38, 129.9, 128.3, 128.0, 120.9, 64.3, -1.7; IR (neat) 2957, 1591, 1486, 1252  $\text{cm}^{-1}$ ; HRMS (EI) calc. for  $[\text{C}_{15}\text{H}_{17}\text{BrOSi}]^+$  320.0235, found 320.0236; CHN calc.: C, 56.08; H, 5.33, found: C, 56.25; H, 5.50.

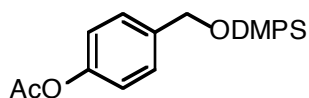

**Acetic acid 4-(dimethyl-phenyl-silanyloxymethyl)-phenyl ester (5c).**  $^1\text{H}$  NMR (300 MHz,  $\text{CDCl}_3$ )  $\delta$  7.62-7.58 (m, 2H), 7.45-7.35 (m, 3H), 7.38-7.22 (m, 2H), 7.05-7.01 (m, 2H), 4.67 (s, 2H), 2.30 (s, 3H), 0.41 (s, 6H);  $^{13}\text{C}$  NMR (100 MHz,  $\text{CDCl}_3$ )  $\delta$  217.1, 169.9, 150.1, 138.7, 137.8, 133.9, 130.1, 128.4, 128.3, 121.7, 64.9, -1.3; IR (neat) 2958, 1765, 1213  $\text{cm}^{-1}$ ; HRMS (EI) calc. for  $[\text{C}_{17}\text{H}_{20}\text{O}_3\text{Si}]^+$  300.1182, found 300.1185; CHN calc.: C, 67.96; H, 6.71, found: C, 67.94; H, 6.92.

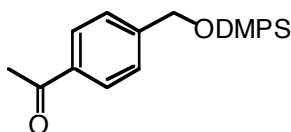

**1-[4-(Dimethyl-phenyl-silanyloxymethyl)-phenyl]-ethanone (5d).**  $^1\text{H}$  NMR (400 MHz,  $\text{CDCl}_3$ )  $\delta$  7.93 (m, 2H), 7.57 (m, 2H), 7.42 (m, 5H), 4.76 (s, 2H), 2.59 (s, 3H), 0.44 (s, 6H);  $^{13}\text{C}$  NMR (100 MHz,  $\text{CDCl}_3$ )  $\delta$  197.9, 146.4, 137.2, 136.1, 133.5, 129.9, 128.5, 128.0, 126.3, 64.4, 26.7, -1.7; IR (neat) 3585, 1679, 1607, 1262, 1116, 1086  $\text{cm}^{-1}$ ; HRMS (EI) calc. for  $[\text{C}_{17}\text{H}_{20}\text{O}_2\text{Si}]^+$  285.1307, found: 285.1311.

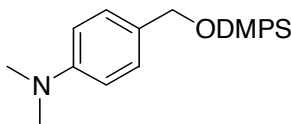

**[4-(Dimethyl-phenyl-silanyloxymethyl)-phenyl]-dimethyl-amine (5e).**  $^1\text{H}$  NMR (300 MHz,  $\text{C}_6\text{D}_6$ )  $\delta$  7.60 (m, 2H), 7.15 (m, 5H), 6.57 (m, 2H), 4.65 (s, 2H), 2.47 (s, 6H), 0.32 (s, 6H);  $^{13}\text{C}$  (300 MHz,  $\text{C}_6\text{D}_6$ )  $\delta$  161.3, 138.5, 133.9, 129.7, 129.3, 128.4, 128.3, 128.1, 127.7, 122.8, 65.6, 40.5, -1.1; IR (neat) 2957, 1615, 1524  $\text{cm}^{-1}$ .

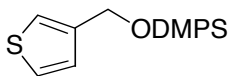

**Dimethyl-phenyl-(thiophen-3-ylmethoxy)-silane (5f).** Starting material was chromatographed prior to use.  $^1\text{H}$  NMR (300 MHz,  $\text{CDCl}_3$ )  $\delta$  7.63-7.58 (m, 2H), 7.45-7.36 (m, 3H), 7.28-7.25 (m, 1H), 7.14-7.12 (m, 1H), 7.00 (m, 1H), 4.69 (s, 2H), 0.40 (s, 6H);  $^{13}\text{C}$  NMR (100 MHz,  $\text{CDCl}_3$ )  $\delta$  142.1, 137.6, 133.6, 129.8, 128.0, 126.8, 125.9, 121.5, 61.05, -1.6; IR (neat) 2957, 1427, 1252  $\text{cm}^{-1}$ ; HRMS (EI) calc. for  $[\text{C}_{15}\text{H}_{16}\text{OSSi}]^+$  248.0691, found 248.0696; CHN calc.: C, 62.85; H, 6.49, found: C, 62.53; H, 6.64.

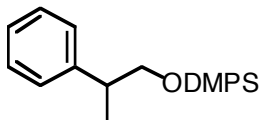

**Dimethyl-phenyl-(2-phenyl-propoxy)-silane (5g).**  $^1\text{H}$  NMR (300 MHz,  $\text{CDCl}_3$ )  $\delta$  7.51-7.58-7.48 (m, 2H), 7.41-7.16 (m, 8H), 3.69 (dd,  $J = 9.9, 6.1$ , 2H), 3.58 (dd,  $J = 9.9, 7.6$ , 2H), 2.91 (app h,  $J = 7.0$ , 1H), 1.27 (d,  $J = 7.0$ , 3H), 0.30 (s, 3H), 0.29 (s, 3H);  $^{13}\text{C}$  NMR (100 MHz,  $\text{CDCl}_3$ )  $\delta$  144.4, 138.0, 133.5, 129.6, 128.3, 127.9, 127.6, 126.4, 69.2, 42.4, 17.6, -1.8, -1.8; IR (neat) 2960, 1428, 1252  $\text{cm}^{-1}$ ; LRMS (EI) calc. for  $[\text{C}_{17}\text{H}_{20}\text{O}_3\text{Si-CH}_3]^+$  255, found 255 ; CHN calc.: C, 75.50; H, 8.20, found: C, 75.29; H, 8.09.

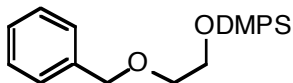

**(2-Benzyloxy-ethoxy)-dimethyl-phenyl-silane (5h).**  $^1\text{H}$  NMR (300 MHz,  $\text{CDCl}_3$ )  $\delta$  7.60-7.57 (m, 2H), 7.39-7.26 (m, 8H), 4.53 (s, 2H), 3.78 (t,  $J = 5.2$ , 2H), 3.55 (t,  $J = 5.2$ , 2H), 0.39 (s, 6H);  $^{13}\text{C}$  NMR (100 MHz,  $\text{CDCl}_3$ )  $\delta$  138.4, 137.8, 133.6, 129.6, 129.9,

128.4, 127.9, 127.7, 127.6, 73.2, 71.4, 62.6, -1.7; IR (neat) 2864, 1428, 1252  $\text{cm}^{-1}$ ; HRMS (EI) calc. for  $[\text{C}_{17}\text{H}_{22}\text{O}_2\text{Si}]^+$  286.1389, found 286.1381; CHN calc.: C, 71.28; H, 7.74, found: C, 71.10; H, 7.92.

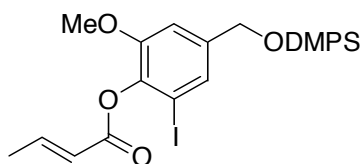

**But-2-enoic acid 4-(dimethyl-phenyl-silanyloxymethyl)-2-iodo-6-methoxyphenyl ester (5i).**  $^1\text{H}$  NMR (300 MHz,  $\text{CDCl}_3$ )  $\delta$  7.59 (m, 2H), 7.39 (m, 3H), 7.32-7.22 (m, 2H), 6.86 (s, 1H), 6.11 (dq,  $J = 15.5, 1.7$ , 1H), 4.55 (s, 2H), 3.78 (s, 3H), 1.99 (dd,  $J = 6.9, 1.7$ , 1H), 0.44 (s, 6H);  $^{13}\text{C}$  NMR (75 MHz,  $\text{CDCl}_3$ )  $\delta$  163.3, 151.6, 147.7, 141.0, 139.6, 137.2, 133.6, 129.9, 128.0, 128.0, 121.5, 110.7, 91.5, 64.0, 56.1, 18.4, -1.8; IR (neat) 2957, 1745, 1139  $\text{cm}^{-1}$ ; HRMS (EI) calc. for  $[\text{C}_{20}\text{H}_{23}\text{IO}_4\text{Si}]^+$  482.0410, found 482.0417; CHN calc.: C, 49.80; H, 4.81, found: C, 49.59; H, 4.71.

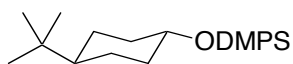

**(4-tert-Butyl-cyclohexyloxy)-dimethyl-phenyl-silane (5j).**  $^1\text{H}$  NMR (300 MHz,  $\text{CDCl}_3$ )  $\delta$  7.57 (m, 2H), 7.37 (m, 3H), 3.50 (m, 1H), 1.87 (d,  $J = 12.9$ , 2H); 1.71 (m, 2H); 1.26 (m, 2H), 0.94 (m, 3H), 0.82 (s, 9H), 0.38 (s, 6H);  $^{13}\text{C}$  NMR (100 MHz,  $\text{CDCl}_3$ )  $\delta$  138.8, 133.5, 129.4, 127.8, 72.3, 47.1, 36.2, 32.3, 27.6, 25.8, -0.9484; IR 1251, 1116, 1087  $\text{cm}^{-1}$ ; HRMS (EI) calc. for  $[\text{C}_{18}\text{H}_{30}\text{OSi}]^+$  290.2063, found 290.2066.



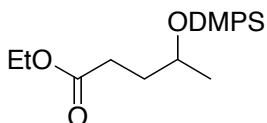

**4-(Dimethyl-phenyl-silanyloxy)-pentanoic acid ethyl ester (5k).**  $^1\text{H}$  NMR (300 MHz,  $\text{C}_6\text{D}_6$ )  $\delta$  7.54 (m, 2H), 7.18 (m, 3H), 3.90 (q,  $J$  7.0, 2H), 3.73 (sextet,  $J$  6.1, 1H), 2.24 (m, 2H), 1.70 (m, 2H), 0.92 (m, 6H), 0.27 (2, 6H);  $^{13}\text{C}$  NMR (300 MHz,  $\text{C}_6\text{D}_6$ )  $\delta$  172.9, 138.6, 133.8, 133.6, 133.3, 129.7, 129.6, 128.3, 128.0, 127.7, 68.1, 60.1, 34.8, 30.7, 23.8, 14.5, 1.1, -0.7, -0.9; ; IR (neat) 2963, 1735, 1253, 1118  $\text{cm}^{-1}$ .

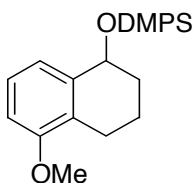

**(5-Methoxy-1,2,3,4-tetrahydro-naphthalen-1-yloxy)-dimethyl-phenyl-silane (5l).**  $^1\text{H}$  NMR (400 MHz,  $\text{CDCl}_3$ )  $\delta$  7.65 (m, 2H), 7.39 (m, 3H), 7.12 (t,  $J$  7.9, 1H), 6.91 (d,  $J$  7.8, 1H) 6.70 (d,  $J$  8.1, 1H), 4.8 (m, 1H), 3.79 (s, 3H), 2.60 (m, 2H) 1.96 (m, 1H), 1.74 (m, 3H), 0.46 (d,  $J$  3.1, 6H);  $^{13}\text{C}$  156.2, 141.5, 140.6, 133.2, 128.7, 127.7, 127.3, 124.2, 122.3, 108.0, 81.9, 55.5, 35.1, 22.2, 19.3, 1.0, 0.03; IR 1582.5, 1457.9, 1247.5, 1112.1, 826.1; EI HRMS calcd. for  $[\text{C}_{19}\text{H}_{24}\text{O}_2\text{Si}]^+$  312.1546, Found 312.1546; Anal. Calcd. for  $\text{C}_{19}\text{H}_{24}\text{O}_2\text{Si}$ : C 73.03, H 7.74; Found C 73.21, H 7.84.

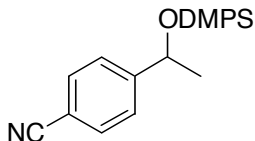

**4-[1-(Dimethyl-phenyl-silanyloxy)-ethyl]-benzonitrile (5m).**  $^1\text{H}$  NMR (300 MHz,  $\text{C}_6\text{D}_6$ )  $\delta$  7.43 (m, 2H), 7.27 (m, 3H), 6.97 (m, 2H), 6.83 (m, 2H), 4.48 (q, 1H,  $J$  6.3), 1.09

(d, 3H, *J* 6.3), 0.21 (s, 3H), 0.14 (s, 3H), <sup>13</sup>C NMR (300 MHz, C<sub>6</sub>D<sub>6</sub>)  $\delta$  151.2, 137.7, 133.7, 132.0, 130.1, 128.3, 128.2, 127.7, 126.0, 118.9, 111.4, 70.8, 26.8, -0.8, -1.2; IR (neat) 2975, 1610, 1254  $\text{cm}^{-1}$ .

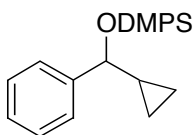

**(Cyclopropyl-phenyl-methoxy)-dimethyl-phenyl-silane (5n).** <sup>1</sup>H NMR (400 MHz, CDCl<sub>3</sub>)  $\delta$  7.55 (d, *J* 1.5, 2 H Hz), 7.54-7.24 (m, 8H), 4.09 (d, *J* 7.3, 1H), 1.16 (m, 1H), 0.43 (m, 4H), 0.33 (s, 3 H), 0.204 (s, 3 H); <sup>13</sup>C (400 MHz, CDCl<sub>3</sub>)  $\delta$  144.9, 133.7, 133.6, 129.5, 128.1, 127.7, 127.1, 126.1, 78.6, 19.9, 3.8, 2.7, -0.7, -1.2; IR (neat) 1252.2, 1116.9, 1056.5  $\text{cm}^{-1}$ ; HRMS (FAB) calc. for [C<sub>18</sub>H<sub>22</sub>OSi]<sup>+</sup> 282.1432, found 282.1440.

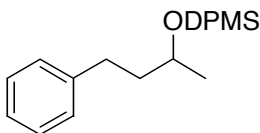

**Methyl-(1-methyl-3-phenyl-propoxy)-diphenyl-silane (5o).** <sup>1</sup>H 7.67 (m, 4H), 7.48 (m, 7H), 7.22 (m, 4H), 4.01 (m, 1H), 2.75 (m, 1H), 2.62 (m, 1H), 1.90 (m, 1H), 1.78 (m, 1H), 1.24 (d, *J*=6.1, 3H), 0.71 (s, 3H); <sup>13</sup>C 142.4, 136.9, 136.8, 136.8, 134.5, 134.5, 129.8, 128.4, 128.4, 127.9, 125.7, 71.9, 69.0, 41.2, 32.0, 29.8, 23.7, -2.2; Anal. Calcd. for C<sub>23</sub>H<sub>26</sub>OSi: C 79.72, H 7.56; Found C 79.44, H 7.88
